# Supplementary material for: A fluorimetric nitrite biosensor with polythienothiophene-fullerene thin film detectors for on-site water monitoring
Source: Royal Society of Chemistry journal article supplement (doi:10.1039/c8an02441c), 2019-01-01
Supplement: c8an02441c1.pdf [file c8an02441c1.pdf]

## Electronic Supplementary Information

### **A fluorimetric nitrite biosensor with polythienothiophene-fullerene thin film detectors for on-site water monitoring**

Nuno Miguel Matos Pires<sup>a,b,c</sup>, Tao Dong<sup>b,\*</sup>, Zhaochu Yang<sup>a</sup>

<sup>a</sup>Chongqing Key Laboratory of Micro-Nano Systems and Smart Transduction, Collaborative  
Innovation Center on Micro-Nano Transduction and Intelligent Eco-Internet of Things,  
Chongqing Key Laboratory of Colleges and Universities on Micro-Nano Systems Technology  
and Smart Transducing, National Research Base of Intelligent Manufacturing Service,  
Chongqing Technology and Business University, Nan'an District, Chongqing, 400067, China

<sup>b</sup>Department of Microsystems - IMS, Faculty of Technology, Natural Sciences and Maritime  
Sciences, University of South-Eastern Norway-USN, P.O. Box 235, 3603 Kongsberg, Norway

<sup>c</sup>Centre for Environmental Radioactivity (CERAD CoE), Norwegian University of Life Sciences  
(NMBU), Faculty of Environmental Sciences and Natural Resource Management, P.O. Box  
5003, NO-1432 Ås, Norway

\*Corresponding author: Tel: +47 3100 9321. E-mail: tao.dong@usn.no;

## Nanomaterial characterization

### *Surface morphology*

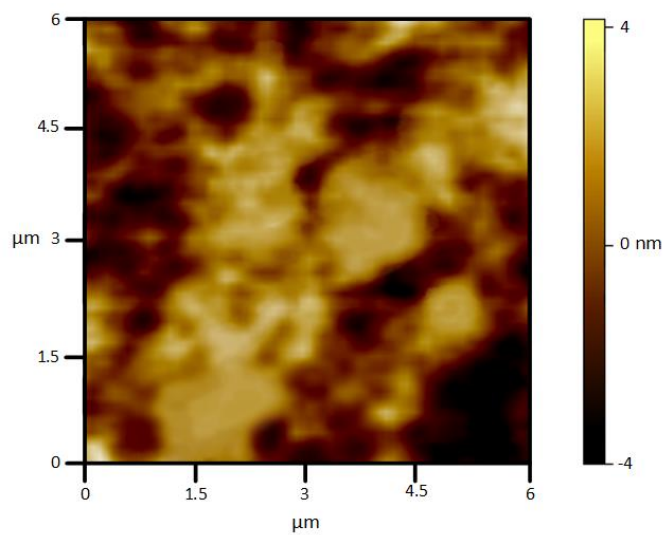

**Fig. S1** AFM topography image (scan size  $6\times 6\mu\text{m}$ ) of the fabricated BHJ film.

## Experimental methods

### *Composition of aquaculture background water*

**Table S1.** Description of components and quantities for the preparation of aquaculture background water with soft hardness

| Components                            | Concentration in 1L (mg L <sup>-1</sup> ) | Molar Mass (g mol <sup>-1</sup> ) |
|---------------------------------------|-------------------------------------------|-----------------------------------|
| NaHCO <sub>3</sub>                    | 12                                        | 84.01                             |
| CaSO <sub>4</sub> x 2H <sub>2</sub> O | 7.5                                       | 172.19                            |
| MgSO <sub>4</sub>                     | 7.5                                       | 120.38                            |
| KCl                                   | 0.5                                       | 74.55                             |

## Experimental results

### *Calibration curve with aquaculture background water*

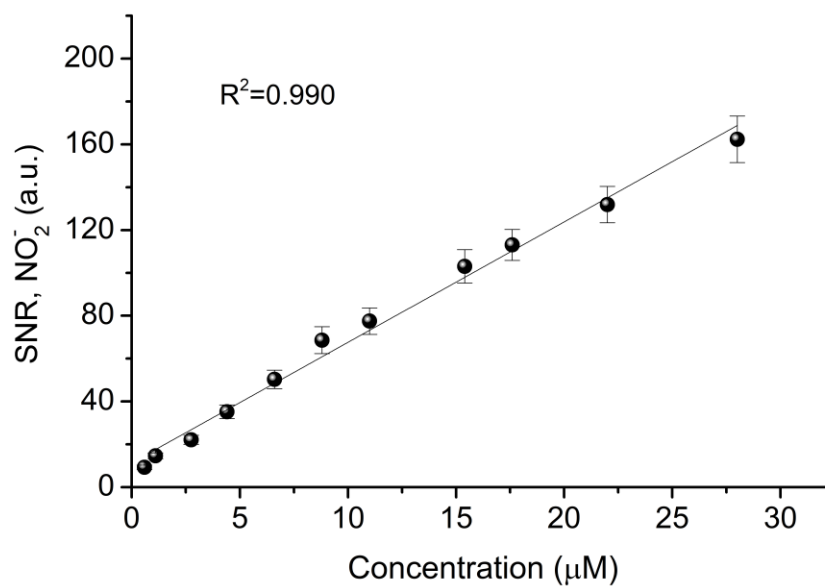

**Fig. S2.** Dose-response curve of nitrite detection in aquaculture background water using the PTB7:PC<sub>70</sub>BM OPD fluorimetric biosensor. SNR was determined by the ratio of photocurrent due to nitrite detection to that obtained with no addition of water sample. Detection tests were conducted in triplicate ( $n=3$ ), RSD<9.5%.

## Experimental results

### *Detection tests in different matrices*

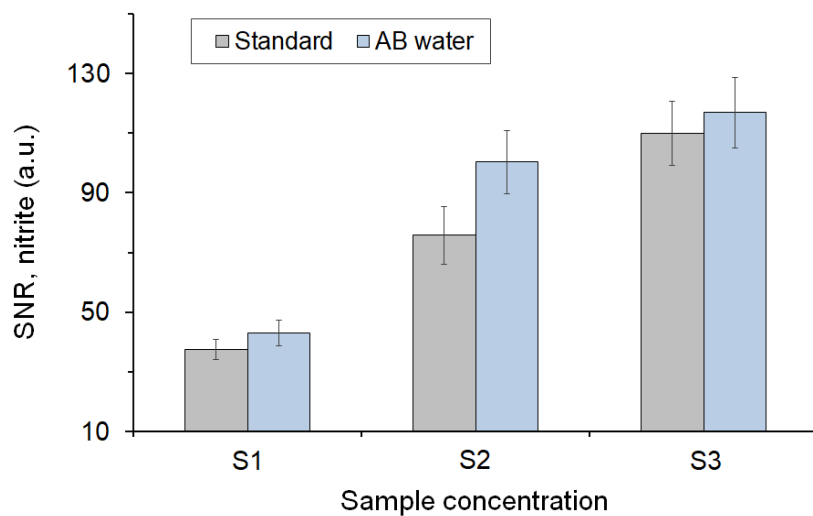

**Fig. S3.** Detection of nitrite in standard (DI water background) and aquaculture background water samples using the PTB7:PC<sub>70</sub>BM OPD fluorimetric biosensor. Detection tests were conducted in triplicate ( $n=3$ ) for the concentrations 5.5  $\mu\text{M}$  (S1), 15.4  $\mu\text{M}$  (S2) and 20  $\mu\text{M}$  (S3).
